# Supplementary material for: Cost-effectiveness of a day hospital falls prevention programme for screened community-dwelling older people at high risk of falls
Source: PubMed Central journal article supplement — Age Ageing. 2010 Sep 10;39(6):710–6. doi: 10.1093/ageing/afq108 (PMC2956532; doi:10.1093/ageing/afq108), 2010-09-10
Supplement: supp_afq108_afq108supp.pdf [file supp_afq108_afq108supp.pdf]

## Supplementary Data

## Appendix 1 Unit costs

|                                                                  | Unit cost | Source                                                                            |
|------------------------------------------------------------------|-----------|-----------------------------------------------------------------------------------|
| <b>Primary health care</b>                                       |           |                                                                                   |
| GP (Per surgery/clinic minute)                                   | £2.90     | PSSRU section 9.8b Pg127                                                          |
| Practice nurse/district nurse<br>(per consultation inc training) | £9.00     | PSSRU section 9.6 p124                                                            |
| <b>Secondary health care (assume outpatient first visit)</b>     |           |                                                                                   |
| Accident and Emergency<br>Services: leading to admission         | £107.40   | NHS Ref Costs 2007-8                                                              |
| Urologist                                                        | £93.00    | NHS Ref Costs 2007-8                                                              |
| Psychiatrist                                                     | £122.00   | NHS Ref Costs 2007-8                                                              |
| Orthopaedics                                                     | £57.00    | NHS Ref Costs 2007-8                                                              |
| Neurologist                                                      | £63.00    | NHS Ref Costs 2007-8                                                              |
| Cardiologist                                                     | £75.00    | NHS Ref Costs 2007-8                                                              |
| Dietician                                                        | £50.00    | NHS Ref Costs 2007-8                                                              |
| ENT                                                              | £63.00    | NHS Ref Costs 2007-8                                                              |
| <b>Inpatient cost per bed day</b>                                | £425.73   | Weighted average cost all inpatient care - cost<br>per night NHS Ref Costs 2007-8 |
| <b>Falls prevention programme</b>                                |           |                                                                                   |
| Medical consultation (Geriatric<br>Medicine) - Cost/hr           | £139.00   | NHS Ref Costs 2007-8                                                              |
| Physiotherapist - Cost/hr                                        | £38.00    | PSSRU section 12.1                                                                |

Trent Falls Prevention Supplementary materials

|                                   |         |                                                                                                                                                                                                                                              |
|-----------------------------------|---------|----------------------------------------------------------------------------------------------------------------------------------------------------------------------------------------------------------------------------------------------|
| Nurse - Cost/hr                   | £40.00  | PSSRU section 13.3                                                                                                                                                                                                                           |
| Occupational therapist - Cost/hr  | £41.00  | PSSRU section 12.2                                                                                                                                                                                                                           |
| Occupational therapist Home Visit | £39.00  | PSSRU section 10.7                                                                                                                                                                                                                           |
| ECG                               | £27.00  | NHS Ref Costs 2007-8                                                                                                                                                                                                                         |
| 24 hour tape                      | £56.00  | NHS Ref Costs 2007-8                                                                                                                                                                                                                         |
| ECHO                              | £58.00  | NHS Ref Costs 2007-8                                                                                                                                                                                                                         |
| 24 hour BP monitoring             | £56.00  | NHS Ref Costs 2007-8                                                                                                                                                                                                                         |
| CT head                           | £91.00  | NHS Ref Costs 2007-8                                                                                                                                                                                                                         |
| Other radiology (specify)         | £65.00  | NHS Ref Costs 2007-8                                                                                                                                                                                                                         |
| Bone densitometry                 | £67.00  | NHS Ref Costs 2007-8                                                                                                                                                                                                                         |
| Bloods (biochemistry)             | £1.00   | NHS Ref Costs 2007-8                                                                                                                                                                                                                         |
| Bloods (haematology)              | £3.00   | NHS Ref Costs 2007-8                                                                                                                                                                                                                         |
| Tilt table test                   | £187.36 | <a href="http://www.haps.bham.ac.uk/publichealth/horizon/outputs/documents/2002/InsertableLoopRecorders.pdf">http://www.haps.bham.ac.uk/publichealth/horizon/outputs/documents/2002/InsertableLoopRecorders.pdf</a> - inflated to 2007 value |

PSSRU unit costs were used for staff time from medical, nursing and allied health professionals. This source aggregates staff wages, salary on-costs, and cost of training, overheads and capital costs, basing capital cost considerations on Tender prices from Building Cost Information Service.

**Appendix 2 Baseline characteristics of participants**

| Characteristic                                                |               | <b>Control<br/>N=181</b> | <b>Intervention<br/>N=183</b> |
|---------------------------------------------------------------|---------------|--------------------------|-------------------------------|
| Centre/stratum                                                | Nottingham    | 120 (66%)                | 121 (66%)                     |
|                                                               | Derby         | 61 (34%)                 | 62 (34%)                      |
| Age (years)                                                   | Mean (SD)     | 78.4 (5.6)               | 79.1 (5.7)                    |
|                                                               | Median (IQR)  | 77.6<br>(73.5-82.9)      | 78.3<br>(75.0-82.9)           |
|                                                               | Range         | 70-92                    | 70-101                        |
| Female                                                        | Frequency (%) | 112 (62%)                | 106 (58%)                     |
| At least one fall in previous 12 months                       | Frequency (%) | 102 (56%)                | 108 (59%)                     |
| Taking more than four medications                             | Frequency (%) | 89 (49%)                 | 103 (56%)                     |
| History of stroke                                             | Frequency (%) | 20 (11%)                 | 33 (18%)                      |
| Parkinson's disease                                           | Frequency (%) | 2 (1%)                   | 4 (2%)                        |
| Inability to stand from a chair without using arms to push up | Frequency (%) | 115 (64%)                | 125 (68%)                     |
| Symptoms of dizziness on standing                             | Frequency (%) | 115 (64%)                | 103 (56%)                     |
| Use of a mobility aid                                         | Frequency (%) | 86 (48%)                 | 96 (52%)                      |
| Housebound/not housebound (mobility impairment)               | Frequency (%) | 39 (22%)                 | 44 (24%)                      |

**Appendix 3 Incidence of fall events & follow up times**

## Trent Falls Prevention Supplementary materials

|                                                                                   | Falls prevention programme<br>(n = 172) | Usual care<br>(n = 172) | Usual care excluding outlier<br>(n = 171) |
|-----------------------------------------------------------------------------------|-----------------------------------------|-------------------------|-------------------------------------------|
| Number of falls                                                                   | 260                                     | 417                     | 310                                       |
| Follow up time (person years)                                                     | 151.2                                   | 156.7                   | 155.8                                     |
| Mean falls per person-year (range)                                                | 1.7 (0 – 18)                            | 2.7 (0 – 107)           | 2.0 (0 – 28)                              |
| Number of injurious falls                                                         | 71                                      | 70                      | 69                                        |
| Injurious falls per person-year                                                   | 0.5                                     | 0.5                     | 0.5                                       |
| Number of participants with falls leading to fracture                             | 5                                       | 3                       | 3                                         |
| Number of falls resulting in hospitalisations                                     | 7                                       | 6                       | 6                                         |
| Died during follow-up                                                             | 8                                       | 8                       | 8                                         |
| Admitted to care home during follow-up                                            | 3                                       | 1                       | 1                                         |
| Number of participants reporting <i>at least one</i> fall within follow-up period | 86                                      | 90                      | 89                                        |

## Appendix 4 Costs of Recruitment

|                                              | Stage 1                                    | Stage 2                                         |
|----------------------------------------------|--------------------------------------------|-------------------------------------------------|
|                                              | Eligible from GP practice search & invited | Identified as high risk and invited to join RCT |
| <b>Population</b>                            | 5312                                       | 1481                                            |
| <b>Response</b>                              | 2846                                       | 543                                             |
| <b>Response rate %</b>                       | 54%                                        | 37%                                             |
| <b>Postage</b>                               | £2,895                                     | £440                                            |
| <b>Stationary</b>                            | £850                                       | £260                                            |
| <b>Telephone</b>                             | £1,432                                     | £75                                             |
| <b>Staff costs</b>                           | £53,959                                    |                                                 |
| <b><i>total costs</i></b>                    | £59,910.65                                 |                                                 |
| <b><i>cost per participant recruited</i></b> | £164.59                                    |                                                 |

## Appendix 5 Costs for all Inpatient admissions

|                           | Total inpatient costs |         |                 | Resulting from Falls |         |                 |
|---------------------------|-----------------------|---------|-----------------|----------------------|---------|-----------------|
|                           | Intervention          | Control | Mean difference | Intervention         | Control | Mean difference |
| <b>Patients admitted</b>  | 34                    | 34      | 0               | 7                    | 6       | 1               |
| <b>Inpatient bed days</b> | 552                   | 529     | 23              | 221                  | 142     | 79              |

Trent Falls Prevention Supplementary materials

|                           |          |              |        |         |             |         |
|---------------------------|----------|--------------|--------|---------|-------------|---------|
| <b>Total cost<br/>(£)</b> | £235,003 | £225,21<br>1 | £9,792 | £94,086 | £60,45<br>3 | £33,633 |
| <b>Mean cost<br/>(£)</b>  | £1,374   | £1,317       | £57    | £547    | £354        | £193    |
